# Supplementary material
Source: publisher figshare collection journal article supplement (https://frontiersin.figshare.com/ndownloader/files/25861983)
Supplement: Supplementary file [file 25861983]

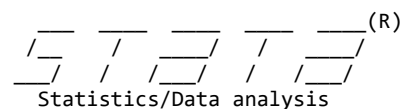

Project: Does Weather Temperature affect COVID-19 Transmission?

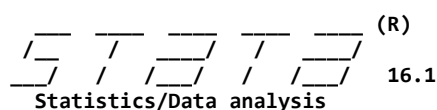

MP - Parallel Edition

(R)

16.1

Copyright 1985-2019 StataCorp LLC  
StataCorp  
4905 Lakeway Drive  
College Station, Texas 77845 USA  
800-STATA-PC <https://www.stata.com>  
979-696-4600 [stata@stata.com](mailto:stata@stata.com)  
979-696-4601 (fax)

Stata license: Single-user 2-core network, expiring 17 Sep 2020  
Serial number: 501609327014  
Licensed to:

Notes:

1. Unicode is supported; see [help unicode advice](#).
2. More than 2 billion observations are allowed; see [help obs advice](#).
3. Maximum number of variables is set to 5,000; see [help set maxvar](#).
4. New update available; type `-update all-`

```
1 . import excel "E:\انوروك\IN PROGRESS\انوروك\Analysis\results\STATA 16.1\B
> ook1.xlsx", sheet("March with Togo") firstrow
(9 vars, 18 obs)
```

```
2 . do "C:\Users\HP\AppData\Local\Temp\STD2bb4_000000.tmp"
```

```
3 . reg lny1 temp1
```

| Source   | SS         | df | MS         | Number of obs | = | 18     |
|----------|------------|----|------------|---------------|---|--------|
| Model    | 5.00416538 | 1  | 5.00416538 | F(1, 16)      | = | 2.68   |
| Residual | 29.8246791 | 16 | 1.86404244 | Prob > F      | = | 0.1208 |
|          |            |    |            | R-squared     | = | 0.1437 |
|          |            |    |            | Adj R-squared | = | 0.0902 |
| Total    | 34.8288444 | 17 | 2.04875556 | Root MSE      | = | 1.3653 |

| lny1  | Coef.     | Std. Err. | t     | P> t  | [95% Conf. Interval] |
|-------|-----------|-----------|-------|-------|----------------------|
| temp1 | -.0680068 | .0415063  | -1.64 | 0.121 | -.1559963 .0199827   |
| _cons | 4.811877  | .6885826  | 6.99  | 0.000 | 3.352147 6.271607    |

```
4 . predict d, cooks
```

```
5 . sort d
```

```
6 . br country d
```

```
7 .
end of do-file
```

```
8 . do "C:\Users\HP\AppData\Local\Temp\STD2bb4_000000.tmp"
```

```
9 . predict diffits, dfits
```

```
10 . generate absdiffits=abs(diffits)
```

```
11 . sort absdiffits
```

```

12 . br country absdiffits
13 .
    end of do-file
14 . do "C:\Users\HP\AppData\Local\Temp\STD2bb4_000000.tmp"
15 . drop in 14/18
    (5 observations deleted)
16 .
    end of do-file
17 . do "C:\Users\HP\AppData\Local\Temp\STD2bb4_000000.tmp"
18 . reg lny1 temp1

```

| Source   | SS                | df        | MS                | Number of obs | = | 13            |
|----------|-------------------|-----------|-------------------|---------------|---|---------------|
| Model    | <b>4.91865664</b> | <b>1</b>  | <b>4.91865664</b> | F(1, 11)      | = | <b>7.12</b>   |
| Residual | <b>7.60083567</b> | <b>11</b> | <b>.690985061</b> | Prob > F      | = | <b>0.0219</b> |
|          |                   |           |                   | R-squared     | = | <b>0.3929</b> |
|          |                   |           |                   | Adj R-squared | = | <b>0.3377</b> |
| Total    | <b>12.5194923</b> | <b>12</b> | <b>1.04329103</b> | Root MSE      | = | <b>.83126</b> |

  

| lny1  | Coef.            | Std. Err.       | t            | P> t         | [95% Conf. Interval] |                  |
|-------|------------------|-----------------|--------------|--------------|----------------------|------------------|
| temp1 | <b>-.0852226</b> | <b>.0319423</b> | <b>-2.67</b> | <b>0.022</b> | <b>-.1555271</b>     | <b>-.0149181</b> |
| _cons | <b>5.124552</b>  | <b>.4900665</b> | <b>10.46</b> | <b>0.000</b> | <b>4.045923</b>      | <b>6.203182</b>  |

```

19 .
    end of do-file
20 . import excel "E:\العمل\IN PROGRESS\انوروك\Analysis\results\STATA 16.1\B
    > ook1.xlsx", sheet("March with Togo") firstrow clear
    (9 vars, 18 obs)
21 . do "C:\Users\HP\AppData\Local\Temp\STD2bb4_000000.tmp"
22 . reg lny2 temp2

```

| Source   | SS                | df        | MS                | Number of obs | = | 18            |
|----------|-------------------|-----------|-------------------|---------------|---|---------------|
| Model    | <b>6.97655647</b> | <b>1</b>  | <b>6.97655647</b> | F(1, 16)      | = | <b>4.92</b>   |
| Residual | <b>22.6966213</b> | <b>16</b> | <b>1.41853883</b> | Prob > F      | = | <b>0.0414</b> |
|          |                   |           |                   | R-squared     | = | <b>0.2351</b> |
|          |                   |           |                   | Adj R-squared | = | <b>0.1873</b> |
| Total    | <b>29.6731778</b> | <b>17</b> | <b>1.74548105</b> | Root MSE      | = | <b>1.191</b>  |

  

| lny2  | Coef.            | Std. Err.       | t            | P> t         | [95% Conf. Interval] |                  |
|-------|------------------|-----------------|--------------|--------------|----------------------|------------------|
| temp2 | <b>-.0960488</b> | <b>.0433104</b> | <b>-2.22</b> | <b>0.041</b> | <b>-.1878627</b>     | <b>-.0042349</b> |
| _cons | <b>6.523001</b>  | <b>.7465545</b> | <b>8.74</b>  | <b>0.000</b> | <b>4.940377</b>      | <b>8.105626</b>  |

```

23 . predict d, cooks
24 . sort d

```

```

25 . br country d
26 .
    end of do-file
27 . do "C:\Users\HP\AppData\Local\Temp\STD2bb4_000000.tmp"
28 . predict diffits, dfits
29 . generate absdiffits=abs(diffits)
30 . sort absdiffits
31 . br country absdiffits
32 .
    end of do-file
33 . do "C:\Users\HP\AppData\Local\Temp\STD2bb4_000000.tmp"
34 . drop in 14/18
    (5 observations deleted)
35 .
    end of do-file
36 . do "C:\Users\HP\AppData\Local\Temp\STD2bb4_000000.tmp"
37 . reg lny2 temp2

```

| Source   | SS                | df        | MS                | Number of obs | = | 13            |
|----------|-------------------|-----------|-------------------|---------------|---|---------------|
| Model    | <b>6.72345053</b> | <b>1</b>  | <b>6.72345053</b> | F(1, 11)      | = | <b>8.54</b>   |
| Residual | <b>8.65645716</b> | <b>11</b> | <b>.786950651</b> | Prob > F      | = | <b>0.0139</b> |
|          |                   |           |                   | R-squared     | = | <b>0.4372</b> |
|          |                   |           |                   | Adj R-squared | = | <b>0.3860</b> |
| Total    | <b>15.3799077</b> | <b>12</b> | <b>1.28165897</b> | Root MSE      | = | <b>.8871</b>  |

  

| lny2  | Coef.            | Std. Err.       | t            | P> t         | [95% Conf. Interval] |                  |
|-------|------------------|-----------------|--------------|--------------|----------------------|------------------|
| temp2 | <b>-.1511554</b> | <b>.0517132</b> | <b>-2.92</b> | <b>0.014</b> | <b>-.2649754</b>     | <b>-.0373354</b> |
| _cons | <b>7.146531</b>  | <b>.7797316</b> | <b>9.17</b>  | <b>0.000</b> | <b>5.430354</b>      | <b>8.862709</b>  |

```

38 .
    end of do-file
39 . import excel "E:\اين ج ائع\IN PROGRESS\انوروك\Analysis\results\STATA 16.1\B
    > ook1.xlsx", sheet("March with Togo") firstrow clear
    (9 vars, 18 obs)
40 . do "C:\Users\HP\AppData\Local\Temp\STD2bb4_000000.tmp"
41 . reg lny3 temp3

```

| Source   | SS                | df        | MS                | Number of obs | = | 18             |
|----------|-------------------|-----------|-------------------|---------------|---|----------------|
| Model    | <b>1.75901362</b> | <b>1</b>  | <b>1.75901362</b> | F(1, 16)      | = | <b>0.97</b>    |
| Residual | <b>28.9024808</b> | <b>16</b> | <b>1.80640505</b> | Prob > F      | = | <b>0.3384</b>  |
|          |                   |           |                   | R-squared     | = | <b>0.0574</b>  |
|          |                   |           |                   | Adj R-squared | = | <b>-0.0015</b> |
| Total    | <b>30.6614944</b> | <b>17</b> | <b>1.80361732</b> | Root MSE      | = | <b>1.344</b>   |

  

| lny3  | Coef.            | Std. Err.       | t            | P> t         | [95% Conf. Interval] |                 |
|-------|------------------|-----------------|--------------|--------------|----------------------|-----------------|
| temp3 | <b>-.0536925</b> | <b>.054411</b>  | <b>-0.99</b> | <b>0.338</b> | <b>-.1690386</b>     | <b>.0616536</b> |
| _cons | <b>6.947444</b>  | <b>.9731556</b> | <b>7.14</b>  | <b>0.000</b> | <b>4.884446</b>      | <b>9.010442</b> |

```

42 . predict d, cooksd
43 . sort d
44 . br country d
45 .
    end of do-file
46 . do "C:\Users\HP\AppData\Local\Temp\STD2bb4_000000.tmp"
47 . predict diffits, dfits
48 . generate absdiffits=abs(diffits)
49 . sort absdiffits
50 . br country absdiffits
51 .
    end of do-file
52 . do "C:\Users\HP\AppData\Local\Temp\STD2bb4_000000.tmp"
53 . drop in 16/18
    (3 observations deleted)
54 .
    end of do-file
55 . do "C:\Users\HP\AppData\Local\Temp\STD2bb4_000000.tmp"
56 . reg lny3 temp3

```

| Source   | SS                | df        | MS                | Number of obs | = | 15            |
|----------|-------------------|-----------|-------------------|---------------|---|---------------|
| Model    | <b>3.13643527</b> | <b>1</b>  | <b>3.13643527</b> | F(1, 13)      | = | <b>2.58</b>   |
| Residual | <b>15.8280581</b> | <b>13</b> | <b>1.21754293</b> | Prob > F      | = | <b>0.1325</b> |
|          |                   |           |                   | R-squared     | = | <b>0.1654</b> |
|          |                   |           |                   | Adj R-squared | = | <b>0.1012</b> |
| Total    | <b>18.9644933</b> | <b>14</b> | <b>1.35460667</b> | Root MSE      | = | <b>1.1034</b> |

  

| lny3  | Coef.            | Std. Err.       | t            | P> t         | [95% Conf. Interval]      |
|-------|------------------|-----------------|--------------|--------------|---------------------------|
| temp3 | <b>-.1198775</b> | <b>.0746899</b> | <b>-1.61</b> | <b>0.133</b> | <b>-.2812352 .0414801</b> |
| _cons | <b>7.809504</b>  | <b>1.151181</b> | <b>6.78</b>  | <b>0.000</b> | <b>5.32253 10.29648</b>   |

```

57 .
    end of do-file
58 . import excel "E:\الملح ج اتن\IN PROGRESS\انوروك\Analysis\results\STATA 16.1\B
    ook1.xlsx", sheet("March with Togo") firstrow clear
    (9 vars, 18 obs)
59 . do "C:\Users\HP\AppData\Local\Temp\STD2bb4_000000.tmp"
60 . reg lny4 temp4

```

| Source   | SS                | df        | MS                | Number of obs | = | 18             |
|----------|-------------------|-----------|-------------------|---------------|---|----------------|
| Model    | <b>1.69381583</b> | <b>1</b>  | <b>1.69381583</b> | F(1, 16)      | = | <b>0.67</b>    |
| Residual | <b>40.1640953</b> | <b>16</b> | <b>2.51025596</b> | Prob > F      | = | <b>0.4235</b>  |
|          |                   |           |                   | R-squared     | = | <b>0.0405</b>  |
|          |                   |           |                   | Adj R-squared | = | <b>-0.0195</b> |
| Total    | <b>41.8579111</b> | <b>17</b> | <b>2.46223007</b> | Root MSE      | = | <b>1.5844</b>  |

| lny4  | Coef.     | Std. Err. | t     | P> t  | [95% Conf. Interval] |          |
|-------|-----------|-----------|-------|-------|----------------------|----------|
| temp4 | -.0621128 | .0756148  | -0.82 | 0.423 | -.2224091            | .0981835 |
| _cons | 8.199943  | 1.469792  | 5.58  | 0.000 | 5.084123             | 11.31576 |

```

61 . predict d, cooks d
62 . sort d
63 . br country d
64 .
    end of do-file
65 . do "C:\Users\HP\AppData\Local\Temp\STD2bb4_000000.tmp"
66 . predict diffits, dfits
67 . generate absdiffits=abs(diffits)
68 . sort absdiffits
69 . br country absdiffits
70 .
    end of do-file
71 . do "C:\Users\HP\AppData\Local\Temp\STD2bb4_000000.tmp"
72 . predict diffits, dfits
    variable diffits already defined
    r(110);
    end of do-file
    r(110);
73 . do "C:\Users\HP\AppData\Local\Temp\STD2bb4_000000.tmp"
74 . predict diffits, dfits
    variable diffits already defined
    r(110);
    end of do-file
    r(110);
75 . do "C:\Users\HP\AppData\Local\Temp\STD2bb4_000000.tmp"
76 . predict diffits, dfits
    variable diffits already defined
    r(110);
    end of do-file
    r(110);
77 . do "C:\Users\HP\AppData\Local\Temp\STD2bb4_000000.tmp"

```

```

78 . predict diffits, dfits
    variable diffits already defined
    r(110);

    end of do-file

    r(110);

79 . do "C:\Users\HP\AppData\Local\Temp\STD2bb4_000000.tmp"

80 . predict diffits, dfits
    variable diffits already defined
    r(110);

    end of do-file

    r(110);

81 . do "C:\Users\HP\AppData\Local\Temp\STD2bb4_000000.tmp"

82 . predict diffits, dfits
    variable diffits already defined
    r(110);

    end of do-file

    r(110);

83 . do "C:\Users\HP\AppData\Local\Temp\STD2bb4_000000.tmp"

84 . predict diffits, dfits
    variable diffits already defined
    r(110);

    end of do-file

    r(110);

85 . do "C:\Users\HP\AppData\Local\Temp\STD2bb4_000000.tmp"

86 . predict diffits, dfits
    variable diffits already defined
    r(110);

    end of do-file

    r(110);

87 . do "C:\Users\HP\AppData\Local\Temp\STD2bb4_000000.tmp"

88 . drop in 16/18
    (3 observations deleted)

89 .
    end of do-file

90 . do "C:\Users\HP\AppData\Local\Temp\STD2bb4_000000.tmp"

91 . reg lny4 temp4

```

| Source   | SS         | df | MS         | Number of obs | = | 15     |
|----------|------------|----|------------|---------------|---|--------|
| Model    | 2.80106741 | 1  | 2.80106741 | F(1, 13)      | = | 1.64   |
| Residual | 22.2134259 | 13 | 1.70872507 | Prob > F      | = | 0.2228 |
|          |            |    |            | R-squared     | = | 0.1120 |
|          |            |    |            | Adj R-squared | = | 0.0437 |
| Total    | 25.0144933 | 14 | 1.78674952 | Root MSE      | = | 1.3072 |

| lny4  | Coef.            | Std. Err.       | t            | P> t         | [95% Conf. Interval] |                 |
|-------|------------------|-----------------|--------------|--------------|----------------------|-----------------|
| temp4 | <b>-.1745648</b> | <b>.1363424</b> | <b>-1.28</b> | <b>0.223</b> | <b>-.4691148</b>     | <b>.1199851</b> |
| _cons | <b>9.989674</b>  | <b>2.423247</b> | <b>4.12</b>  | <b>0.001</b> | <b>4.754568</b>      | <b>15.22478</b> |

92 .  
end of do-file

93 .
